# Supplementary material for: Brief communication: Weak correlation between building damage and loss of life from landslides
Source: Copernicus journal article supplement (doi:10.5194/nhess-25-1937-2025), 2025-06-11
Supplement: Supplementary file 1 [file nhess-25-1937-2025-supplement.zip]

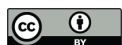

*Supplement of*

**Brief communication: Weak correlation between building damage  
and loss of life from landslides**

**Maximillian Van Wyk de Vries et al.**

*Correspondence to:* Maximillian Van Wyk de Vries (msv27@cam.ac.uk)

- nhess-25-1937-2025-supplement-title-page.pdf
- Figure S1.pdf
- Table\_S1\_namecode\_definitions.xlsx
- Table\_S2\_unique\_names\_list.xlsx

The copyright of individual parts of the supplement might differ from the article licence.
