# Supplementary material for: Brief communication: Weak correlation between building damage and loss of life from landslides
Source: Copernicus journal article supplement (doi:10.5194/nhess-25-1937-2025), 2025-06-11
Supplement: Supplementary file 1 [file nhess-25-1937-2025-supplement.zip]

## Sheet: Sheet1
2	0
AC - Accident	0
AC - Technical Disaster	0
ACCIDENT	0
ACCIDENT CIRCULATION	0
ACCIDENT D'AVION	0
ACCIDENT DE BATEAU	0
ACCIDENT DE ROUTE	0
ACCIDENT DE TRAIN	0
ACCIDENT TRAFFIC	0
ACCIDENTE	0
ACIDENTE	0
ACIDENTE AVIAÇÃO	0
ACIDENTE DE CARRO	0
ACIDENTE DE NAVEGAÇÃO	0
AFLATOXIN	0
AHI HAN	0
AHOGAMIENTO	0
AIR CRASH	0
AIRCRAFT CRASH	0
AIRCRAFT DISASTER/MISSES	0
AKSI TEROR / SABOTASE	0
AKSIDENTE	0
ALLUVION	0
ANIMAL ATTACK	0
ANIMAL INCIDENT	0
ANIMALS/ INSECTS	0
ANIN BOT	0
ARMY WORMS	0
ARMYWORM	0
ATTAQUE ANIMAL	0
ATTAQUE D'ANIMAUX	0
AUTRES	0
AVALANCHE	3
AVENIDA	0
Accident	0
Accident de la circulation	0
Accidental Death	0
Accidente	0
Accidente aéreo	0
Accidente de transporte	0
Accidente de tránsito	0
Accidente en el medio náutico	0
Accidente ferroviario	0
Accidente fluvial	0
Accidente minero	0
Actividad Volcánica	4
Actividad volcánica	4
Aguaje	0
Ahogado	0
Ahogamiento	0
Air pollution	0
Alluvium	0
Alud	3
Aluvión	0
Aluvión (Huayco)	0
Amenaza de bomba	0
Animal Diseases	0
Armed Robbery	0
Asit yağmurları	0
Avalanche	3
Avenida torrencial	8
Aşırı soğuklar	11
BANJIR	2
BIOLOGICAL	0
BIOLOGICO	0
BIOLOGIQUE	0
BIOLOŠKA MIGRACIJA ILI GUBITAK	0
BOAT ACCIDENT	0
BOAT CAPSIZE	0
BOAT CAPSIZED	0
BOAT SINKING	0
BREACH	0
BUILDING ACCIDENT	0
BUILDING COLLAPSE	0
BUILDING SLIDE	0
BURA	0
BUSH FIRE	12
Biological migration or loss	0
Biológico	0
Boğulma	0
Building Collapse	0
BÚSQUEDA	0
Bão	0
Búsqueda	0
CANICULE	10
CAÍDA DE ARBOL	0
CE - Complex Emergency	0
CHEIAS	2
CHEMICAL SPILLS	0
CHOLERA	0
CHUVAS	8
CICLON	8
CICLONE	8
CIVIL STRIFE AND POLICE ARSON	0
COASTAL EROSION	0
COASTAL FLOOD	2
COASTLINE	0
COLAPSO ESTRUCTURAL	0
COLD WAVE	11
COLEOPTERES	0
COLERA	0
COMMERCIAL FIRE	0
CONFLICT	0
CONFLIT FONCIER	0
CONFLITO	0
CONFLITO HOMEM FAUNA BRAVIA	0
CONFLITU	0
CONTAMINATION	0
CRISE ACRIDIENNE	0
CW - Cold Wave	11
CYCLONE	8
CYCLONE AND FLOODS	8
CYCLONE AND RAINSTORM	8
CYCLONE WIND	8
CYCLONES	8
Cabeza de Agua	2
Cambio línea de costa	0
Catastrophes industrielles	0
Caída de Arbol	0
Change in coastline	0
Chenille	0
Chuvas Forts C/Ventos Relampag	8
Colapso estructural	0
Cold Wave	11
Conflict	0
Conmoción social	0
Contaminación	0
Contamination	0
Corriente de resaca	0
Covid-19	0
Crime	0
DEGAT D'ANIMAUX	0
DEGATS D'ANIMAUX SAUVAGES	0
DEPRESSAO	0
DERRAMAMENTO DE PETRÓLEO	0
DESCARGA ELECTRICA	5
DESCARRILAMENTO	0
DESLIZAMENTO	1
DESLIZAMENTO DE TERRA	1
DESLIZAMIENTO	1
DESPRENDIMIENTO DE TECHO	0
DESTRUCTION BY INSECTS	0
DISEASE EPIDEMICS	0
DOMESTIC FIRE	0
DR - Drought	9
DROUGHT	9
DROWNING	0
DRY SPELLS	9
Debris Flood	1
Deforestación	0
Deniz kazası	0
Deprem	0
Desaparecido	0
Desaparecido (S)	0
Desaparecido en excursión	0
Desaparecido en medio acuático	0
Desbordamiento	2
Deslizamiento	1
Desprendimiento de Techo	0
Diahorrea	0
Disease	0
Diğer	0
Dolu	0
Domestic Accident	0
Domestic Fire	0
Don	11
Drought	9
Drowning	0
Déficit hídrico	9
Dégradation des terres	0
EARTH TREMORS	7
EARTHQUAKE	7
EBOULEMENT	1
EFFONDREMENT	0
EFFONDREMENT STRUCTURE	0
ELECTRIC STORM	0
ELECTROCUTION	0
ENVAHISSEMENT MAUVAISES HERBES	0
ENXURRADA	2
EP - Epidemic	0
EPIDEMIA	0
EPIDEMIA COVID-19 Reg Geral	0
EPIDEMIAS	0
EPIDEMIC	0
EPIDEMIC/PANDEMIC	0
EPIDEMICS	0
EPIDEMIE	0
EPIZOOTIE	0
EPIZOOTY	0
EQ - Earthquake	7
EROSÃO	0
EROSÃO COSTEIRA	0
ERUPTION	4
EXPLOSION	0
EXPLOSIONS	0
EXPLOSIÓN	0
EXPLOSÃO	0
Earthquake	7
Ecroulement de bâtiments	0
Effondrement de bâtiments	0
Electrical storm	8
Electrocution	0
Emission/Leak	0
Endüstriyel Kazalar	0
Epidemia	0
Epidemic	0
Epidemic Cholera	0
Epidemics	0
Epidémie	0
Epidémies	0
Epizootia	0
Epizootie	0
Erosion	0
Erosion Côtière	0
Erosion côtière	0
Erosión	0
Erossion	0
Escape	0
Explosion	0
Explosions	0
Explosión	0
FAMINE	0
FEBRE AMARELA	0
FEU DE BROUSSE	12
FEUX DE BROUSSES	12
FIEVRE JAUNE	0
FIRE	0
FIRE HAZARDS	0
FISSURES	0
FL - Flood	2
FLASH FLOOD	2
FLASH FLOODS	2
FLOOD	2
FLOODING OF BUA RIVER	2
FLOODS	2
FOG	0
FOGO	0
FOOD INSECURITY	0
FOOD POISONING	0
FOREST FIRE	12
FOREST FIRE / WILD FIRE	12
FOUDRE	5
FR - Fire	0
FROST	11
Falshflood	2
Fell into a Black Oil Tanker	0
Fell into a Well	0
Feux	0
Feux de Forêts	12
Feux de Végétation	12
Feux de brousse	12
Fire	0
Fire Out break	0
Fire Outbreak	0
Fire Outbreak(shop)	0
Flash Flood	2
Flash Floods	2
Flash Food	2
Flash Foods	2
Flashflood	2
Flashfoods	2
Flood	2
Flooded stream	2
Flooding	2
Flsah Flood	2
Flujo Lodo	1
Flujo de detritos	1
Flujo de escombros	1
Fog	0
Food Poisoning	0
Forest Fire	12
Forest fire	12
Forestal fire	12
Foudre	5
Freezing Rain	8
Frente frío	11
Fuel Explosion	0
Fuel Tanke Explosion	0
Fırtına	8
GAS SPILLS	0
GEL	0
GELOMBANG PASANG / ABRASI	13
GEMPA BUMI	7
GEMPA BUMI DAN TSUNAMI	7
GLISSEMENT DE TERRAIN	1
GLOF	2
GRANIZO	8
GRELE	8
Gale	8
Gas Explosion	0
Generator Fumes	0
Gió mùa	8
Glissement de terrain	1
Granizada	8
Gun Shot Injuries	0
HAIL	8
HAIL STORM	8
HAILSTONE	8
HAILSTORM	8
HAILSTORM & CYCLONE WINDS	8
HAILSTORM AND CYCLONE	8
HAILSTORM AND HEAVY RAINS	8
HAILSTORMS	8
HEAT WAVE	10
HEAVY HAILSTORMS AND RAINS	8
HEAVY RAIN STORM	8
HEAVY RAINFALL & STRONG WINDS	8
HEAVY RAINS	8
HEAVY RAINS AND HAILSTORM	8
HEAVY RAINS AND STORM	8
HEAVY RAINS AND STORMS	8
HEAVY RAINS AND STRONG WINDS	8
HEAVY RAINS AND WINDS	8
HEAVY RAINS, STORM AND FLOODS	8
HEAVY RAINS, WINDS, HAILSTORM	8
HEAVY RAINSTORM	8
HEAVY SNOW	8
HEAVY STORM	8
HEAVY STORMS	8
HEAVY WINDS	8
HEAVY WINDS AND RAIN	8
HEAVY WINDS AND RAINS	8
HIGH TIDE	0
HOUSE FIRE ACCIDENT	0
HUNGER/FAMINE	0
HURRICANE	8
Hail	8
Hambruna	8
Harmful Animals	0
Hava kirliliği	0
Heavy Rain	8
Heavy Rains?	8
Heavy Wind	8
Helada	11
Heyelan	1
High Waves	0
High Winds	8
Hortum	0
Houle	0
House on Fire	0
Hundimiento	8
Huracán	8
Hurricane	8
INCENDIE	0
INCENDIE DE FORET	12
INCENDIE DE FORÊT	12
INCENDIE DU FÔRET	12
INCENDIO	0
INCÊNDIO	0
INDUSTRIAL FIRE	0
INDUSTRIAL POLLUTION	0
INODATION	2
INONDATION	2
INSECT INFESTATION	0
INSTITUTIONAL FIRE	0
INTERVENTION EN MER	0
INTOXICATION	0
INUNDACIÓN	2
INUNDASAUN	2
INUNDAÇÃO	2
INVASION ACRIDIENNE	0
INVASION D'OISEAUX GRANIVORES	0
Incendie	0
Incendies	0
Incendio	0
Incendio de campo	0
Incendio de interfase	0
Incendio estructural	0
Incendio forestal	0
Incendio urbano	0
Incendios forestales	0
Incursion -	0
Industrial Accident	0
Infestation acridienne	0
Infestation aviaire	0
Innondation	2
Inondation	2
Inondations	2
Insect Infestation	0
Inspección	0
Intoxicación	0
Intoxicado	0
Inundación	2
Inundación gradual	2
Inundación repentina	2
Inundation	2
Jeomedikal	0
KEBAKARAN	0
KEBAKARAN HUTAN DAN LAHAN	12
KECELAKAAN TRANSPORTASI	0
KEKERINGAN	9
KONFLIK / KERUSUHAN SOSIAL	0
Kar	8
Kaya düşmesi	1
Không khí lạnh	11
Kuraklık	9
Kıtlık	0
LAINNYA	0
LALORAN BOT	0
LAND SLIDE	1
LAND SUBSIDENCE	0
LANDSLIDE	1
LANDSLIDES	1
LEAK	0
LETUSAN GUNUNG API	4
LIGHTENING	5
LIGHTNING	5
LIQUEFACTION	0
LLUVIA	8
LS - Landslide	1
Lahar	2
Lahares	2
Landslide	1
Leak	0
Licuación	0
Lightning	5
Litoral	0
Livestock Disease Outbreak	0
Lluvias	8
Lũ	2
Lũ quét	2
Lốc tố	6
Lốc+ mưa đá	8
MALADIE FOLIAIRE	0
MALNUTRITION	0
MARINE ACCIDENT	0
MARÉ ALTA	0
MEALY BUG	0
MEASLES	0
MENINGITE	0
MINING ACCIDENT	0
MUDSLIDE	1
MURDER	0
Maden kazaları	0
Mahsur Kalma	0
Major Accident	0
Major Accidents	0
Marejada	0
Materiales peligrosos	0
Meningitis	0
Mine Accident	0
Mini Tornado	6
Montagne Wave	0
Motor Accident	0
Mud Volcano	0
Muerte por Inmersión	0
NAPOLO	0
NAUFRAGE	0
NAUFRAGIO	0
NEIGE	0
NOYADE	0
Naufrage	0
Naufragio	0
Neblina	0
Nevada	0
Noyade	0
Nükleer kazalar	0
Nước dâng	2
OIL SPILLS	0
OIL/HNS Spill	0
OISEAUX GRANIVORES	0
ONDA CALOR	10
OT - Other	0
OTHER	0
OTHER_AC	0
OUTRO	0
Ola de calor	10
Ola de frío	11
Oleaje	0
Onda fría	10
Orage	8
Orman yangınları	12
Other	0
Others	0
Otro	0
Otros	0
Ouragan	8
Ozono	0
PANDEMIA	0
PANIC	0
PANIQUE	0
PERDITION EN MER	0
PERUBAHAN IKLIM	0
PEST	0
PEST AND INSECT INFESTATION	0
PEST INFESTATION	0
PESTE	0
PLAGUE	0
PLANT DISEASE	0
PLUIES ET VENTS VIOLENTS	8
PLUIES EXTREME	8
PLUIES VIOLENTES	8
POLLUTION	0
POLLUTION MARINE	0
POLUIÇÃO	0
PORT AREA HAZARD	0
PRESENCE DES CRIQUETS	0
PUTING BELIUNG	6
Panic	0
Patlama	0
Pauses pluviométriques	9
Pipeline Vandalism	0
Plaga	0
Plagues	0
Pluies hors saison	8
Pánico	0
QUEDA DE ARVORE	0
QUEDA DE AVIAO	0
QUEIMADAS DESCONTROLADAS	0
RAI MONU	0
RAIN STORM	8
RAINS	8
RAINS, HEAVY WINDS	8
RAINSTORM	8
RAINSTORMS	8
RASTAPANJE	0
RAT	0
RATE IN FIELD	0
RAVAGERS AND LOCUSTS PILGRIMS	0
RELÂMPAGO	5
RESCATE	0
RICE YELLOW MOTTLE VIRUS	0
RIVER FLOOD	2
RIVERBANK EROSION	0
ROAD	0
ROAD ACCIDENT	0
ROAD ACCIDENTS	0
ROAD TRAFFIC ACCIDENT	0
ROCK/BOULDER SLIDE	1
ROUGEOLE	0
Racionamiento	0
Rain	8
Rainfall	8
Rainstorm	8
Rape	0
Raudal	2
Rescate	0
Riada	2
River Flood	2
Riverine flood	2
RiverineFlood	2
Riverinflood	2
Rongeur	0
Rough Seas	0
SANDSTORM	8
SECA	9
SECHERESSE	9
SEDIMENTATION	0
SHARK ATTACK	0
SNOW STORM	8
SNOWSTORM	8
SOCIAL CONFLICTS	0
SOCIAL UNREST	0
SPATE	0
SS - Storm Surge	0
ST - Severe Local Storm	8
STORM	8
STORM AND HEAVY RAINS	8
STORM SURGE	8
STORM WIND	8
STORMS	8
STORMY	8
STORMY RAINS	8
STORMY RAINS & FLOODS	8
STORMY RAINS AND HAILSTORM	8
STRONG WIND	8
STRONG WINDS	8
STRONG WINDS AND BUSH FIRE	8
STRONG WINDS AND HEAVY RAINS	8
STRONG WINDS/HAILSTROM	8
STRONGS WINDS AND HEAVY RAINS	8
STRUCT.COLLAPSE	0
STRUCTURAL COLLAPSE	0
STRUCTURE	0
STURTURAL COLLAPSE	0
SUBSIDENCE	0
SURGE	0
Sand Storm	8
Sandstorm	8
Sedimentación	0
Sedimentation	0
Sel / Su baskını	2
Sequía	9
Siniestros de tránsito	0
Sis	0
Sismo	7
Slippery Road	0
Snow Storm	8
Snowfall	8
Snowstorm	8
Socavamiento	0
Spill	0
Storm	8
Storm Surge	0
Storm surge	0
Storm/Gale	8
Strongwind	8
Structural Collapse	0
Structural collapse	0
Sudden Death	0
Suicide	0
SÉCHERESSE	9
Sécheresse	9
Sạt lở đất	1
TANAH LONGSOR	1
TC - Tropical Cyclone	8
TEMPERATURAS EXTREMAS	10
TEMPESTADE	8
TEMPESTADE DE VENTO	8
TEMPETE	8
TEMPETE DE VENTS	8
TEMPU BAILORO	0
TEMPÊTE	8
TERREMOTO	0
TERROR ATTACK	0
TERRORIST ATTACK	0
THUNDER LIGHTING STROKE	5
THUNDER STORM	8
THUNDERSTORM	8
TIDAL SURGE	0
TIDAL WAVE	13
TIDAL WAVES	13
TORMENTA	8
TORNADO	6
TORRANTIAL RAINS	8
TOURBE	0
TRAIN ACCIDENT	0
TRAIN/BUS ACCIDENT	0
TREMBLEMENT DE TERRE	7
TROPICAL CYCLONE	8
TROVOADA	8
TS - Tsunami	13
TSUNAMI	13
Tempestad	8
Tempete	8
Températures extrêmes	10
Tempête	8
Thunder	8
Thunder Storm	8
Thunderstorm	8
Tondering	8
Tormenta	8
Tormenta Tropical	8
Tormenta eléctrica	8
Tormenta severa	8
Tornade	6
Tornado	6
Tornados	6
Torrent	2
Torrential flow	2
Trafik kazası	0
Train Accident	0
Trapped in a Petrol Tanker	0
Traslados	0
Tremblement de terre	7
Tren kazası	0
Tripped into a Well	0
Tromba marina	0
Tsunami	13
Tuberclosis	0
Typhoid Fever	0
Typhoon	8
UDAN	8
URBAN / RURAL FIRE	0
URBAN FIRE	0
Urban Violence	0
Uçak kazası	0
VAGUE DE CHALEUR	10
VAGUE DE FROID	11
VARIOLE AVIAIRE	0
VENDAVAL	8
VENT VIOLENT	8
VO - Volcano	4
VOLCANO	4
Vehicle Accident	0
Vendaval	8
Vendaval/Vientos Fuertes	8
Vents violents	8
Vermin Infestation	0
Vientos fuertes	8
Violence	0
Volcanic Activity	4
Volcano	4
W	0
WETLAND LOSS/DEGRADATION	0
WF - Wild Fires	12
WILD ANIMALS	0
WILD FIRE	12
WIND	8
WIND STORM	8
WINDSTORM	8
Wind	8
Wind Storm	8
Wind Strom	8
Windom flood	2
Windstorm	8
Windstrom	8
Winstrom	8
Winter Storm	8
Wndstrom	8
Yangın	0
Yıldırım	5
Zehirlenme	0
birds	0
fash floods	2
flash flood, windstrom	2
floods	2
fungal toxins (AFLATOXIN)	0
hippos	0
widstorm	8
windstond	8
windstorm with heavy rain	8
windstrm	8
windtorm	8
Árbol caído	0
Çamur akıntıları	1
Çökme / Göçük	0
Çığ	3
ÉPIDÉMIE	0
Şiddetli yağış	8
Бујични токови	2
ГАЗАР ХӨДЛӨЛТ	7
Град	0
Гром (електрична олуја)	5
Експлозија	0
Епидемија	0
ЗУД	0
Земљотрес	7
КИША	8
Клизиште	1
Контаминација	0
МАЛЫН ХАЛДВАРТ ӨВЧИН	0
Мал аж ахуй	0
Мал өвөлжүүлэх	0
Мраз	11
МӨНДӨР	0
Најезда	0
ОБЪЕКТЫН ТҮЙМЭР	0
ОЙН ТҮЙМЭР	12
ОНГОЦНЫ ОСОЛ	0
Олуја	8
Остало	0
Пожар	0
Поплава	2
Снежне падавине	9
Суша	6
ТЭСРЭЛТ ДЭЛБЭРЭЛТ	0
Торнадо	6
УСНЫ ОСОЛ	0
Удес	0
ХИМИЙН БОДИСЫН ОСОЛ	0
ХЭЭРИЙН ТҮЙМЭР	12
Хаварија	0
ХҮЙТЭН БОРОО	8
ХҮНИЙ ХАЛДВАРТ ӨВЧИН	0
ХҮЧТЭЙ САЛХИ ШУУРГА	8
ЦАСНЫ НУРАНГИ	3
Цурење	0
Шумски пожар	0
сум илэрсэн	0
ҮЕР	2
آتش سوزي	0
آتش سوزي جنگل	0
آفات زراعية	0
آفت	0
أمطار غزير	8
أمطار غزيرة	8
إعصار	6
اخرى	0
اغتصاب	0
الاختناق	0
النوهَّ	0
امواج عالية	0
انزلاق أرضي	1
انفجار	0
انهيار الأبنية	0
انهيار جبلي أو جليدي	3
انهيار صخري	1
انهيار صخور	1
بارش	0
بهمن	0
بيماري مسري	0
تآكل السواحل	0
تسرب	0
تسونامي	13
تصادف	0
تلوث	0
تندباد	0
تگرگ	0
جفاف	9
حادثة	0
حرب	12
حريق	0
حريق غابات	0
حوادث السفن والعبارات	0
حوادث الطرق	5
حوادث القطارات	0
خشكسالي	0
رعد و برق	5
روانگرايي	0
رياح قوية	8
زلزال	7
زمين لغزش	0
زمین لرزه	0
زوبعة	6
سازه	0
ساير	0
سقوط الى بئر	0
سيل	2
سيل ناگهاني	2
سيول	2
سيول جارفة	2
سيولة	0
صقيع	11
ضباب	0
طوفان	2
طوفان گونو	2
عاصفة	8
عاصفة ثلجية	8
عاصفة رعدية	8
عاصفة رملية	8
عاصفة رياح	8
غبار كثيف	0
غرق	0
غرق شدگی	0
فيضان	2
فيضان مفاجئ	2
كارثة بيولوجية	0
مقذوف	0
موجة باردة	11
موجة حارة	10
نزاع مسلح	0
نشت	0
هلع	0
وباء	0
وفاة	0
وفاة/اصابة	0
يخ بندان	0
کولاک	8
ຊ້າງທຳລາຍພືດ	0
ນ້ຳຖ້ວມ	2
ນ້ຳປ່າໄຫລຊູ	2
ຝົນຕົກ	8
ພະຍາດລະບາດຄົນ	0
ພະຍູ	0
ຟ້າຜ່າ	5
ສັດຕູພືດ	0
ອັກຄີໄພ	0
ອຸປະຕິເຫດຖ/ໜ	0
ແຫ້ງແລ້ງ	9
ໄຟໄໝ້ປ່າ	12
ខ្យល់ព្យុះ	8
ជំងឺរាតត្បាត	0
ទឹកជំនន់	2
បាក់ច្រាំងទន្លេ	2
រន្ទះបាញ់	5
រាំងស្ងួត	9
សត្វល្អិតបំផ្លាញដំណាំ	0
អគ្គីភ័យ	0
