# Supplementary figures and images for: Brief communication: Weak correlation between building damage and loss of life from landslides
Source: Copernicus journal article supplement (doi:10.5194/nhess-25-1937-2025), 2025-06-11

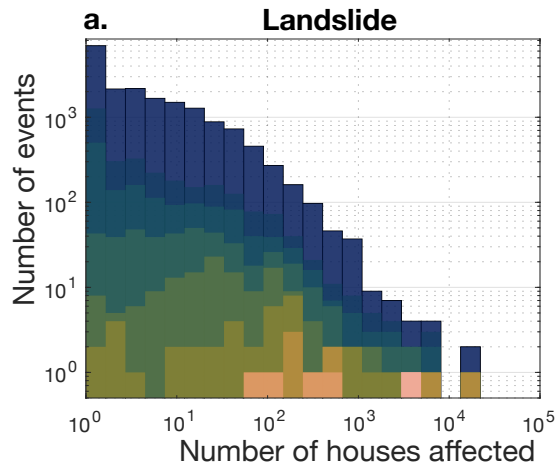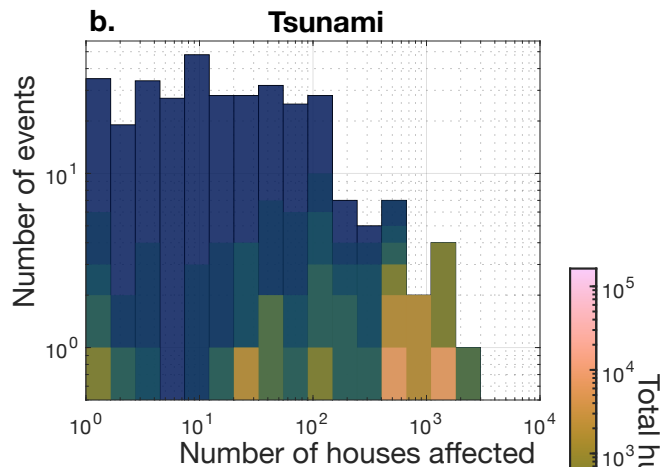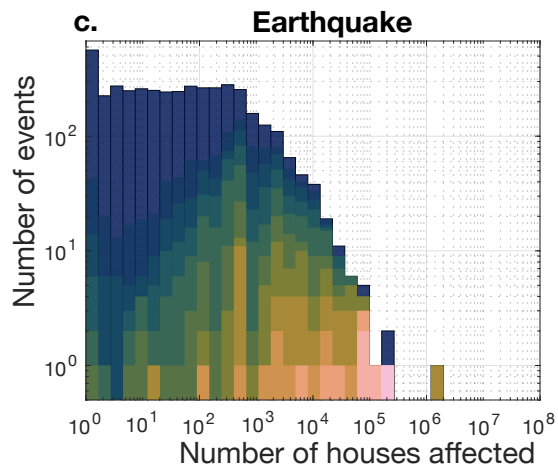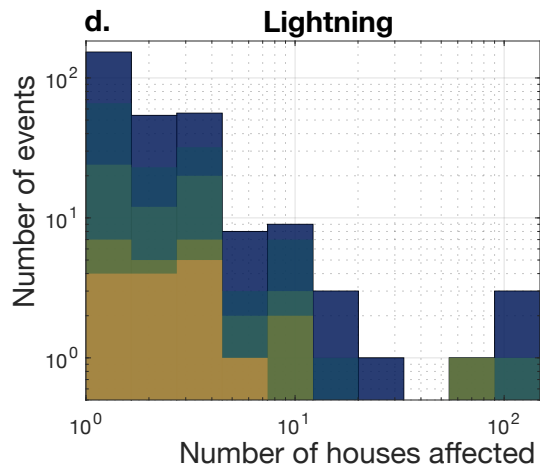

Supplement: Supplementary file 2 [file nhess-25-1937-2025-supplement.zip]
